# Supplementary material for: One-pot synthesis of azabora[6]helicene by a Schiff base forming reaction
Source: Royal Society of Chemistry journal article supplement (doi:10.1039/d4cc00168k), 2024-01-01
Supplement: d4cc00168k1.pdf [file d4cc00168k1.pdf]

## Supporting Information

### One-pot synthesis of azabora[6]helicene by a Schiff base forming reaction

Yuto Kage,<sup>a</sup> Yuchuan Jiang,<sup>a</sup> Namiki Minakuchi,<sup>a</sup> Shigeki Mori<sup>b</sup> and Soji Shimizu<sup>\*a</sup>

<sup>a</sup>Department of Applied Chemistry, Graduate School of Engineering and Centre for Molecular Systems, Kyushu University, Fukuoka 819-0395, Japan

<sup>b</sup>Advanced Research Support Centre (ADRES), Ehime University, Matsuyama 790-8577, Japan

#### Contents:

- i. Experimental
- ii. HR-MS Spectra
- iii. NMR Spectra
- iv. Crystallographic Data
- v. Variable-Temperature (VT) <sup>1</sup>H NMR Spectra and Simulation
- vi. Absorption and Fluorescence Spectra of **4**
- vii. Electrochemistry of **4**
- viii. TDDFT Calculations
- ix. References
- x. Appendix

## i. Experimental

**General procedure:** High-resolution mass spectrometry was performed on a JEOL LMS-HX-110 spectrometer (FAB mode with 3-nitrobenzyl alcohol (NBA) as a matrix).  $^1\text{H}$  NMR spectra were recorded on a JEOL JNM-ECX500R spectrometer (operating at 495.132 MHz for  $^1\text{H}$  and 465.8894 MHz for  $^{19}\text{F}$ ) using residual solvent as an internal reference for  $^1\text{H}$  ( $\delta = 7.26$  ppm for  $\text{CDCl}_3$ ) and using trifluoroacetic acid as an external reference for  $^{19}\text{F}$  ( $\delta = -76.55$  ppm). Electronic absorption spectra were recorded on a JASCO V-770 spectrophotometer. Fluorescence spectra in solution were measured on an SPEX Fluorolog-3-NIR spectrometer (HORIBA) with a NIR-PMT R5509 photomultiplier tube (Hamamatsu) or on a JASCO FR-8650 spectrometer. Fluorescence spectra in a drop-cast film and absolute fluorescence quantum yields in solution and a drop-cast film were measured on a HAMAMATSU C13534-21 calibrated integrating-sphere system with and without self-absorption correction for solution samples and film samples, respectively. Preparative separations were performed using silica gel column chromatography (KANTO Silica Gel 60 N, spherical, neutral, 40–50  $\mu\text{m}$  or KANTO Silica Gel 60 N, spherical, neutral, 63–210  $\mu\text{m}$ ). Thin-layer chromatography (TLC) was performed with aluminum sheet silica gel 60 F<sub>254</sub> (Merck). All reagents and solvents used for syntheses were of commercial reagent grade and were used without further purification except where noted. Spectroscopic grade solvents were used for spectroscopy.

**Crystallographic data collection and structure refinement:** Suitable crystals for X-ray diffraction analysis were obtained by a vapor diffusion method. Data collection was carried out at  $-173$  °C on a Rigaku Saturn724 diffractometer with  $\text{MoK}\alpha$  radiation. The structure was solved by a direct method (SHELXT)<sup>1</sup> and refined using a full-matrix least squares technique (SHELXL).<sup>2</sup> CCDC 2320994 and 2320995 contain the supplementary crystallographic data for this paper. These data can be obtained free of charge via [www.ccdc.cam.ac.uk/data\\_request/cif](http://www.ccdc.cam.ac.uk/data_request/cif), or by emailing [data\\_request@ccdc.cam.ac.uk](mailto:data_request@ccdc.cam.ac.uk), or by contacting The Cambridge Crystallographic Data Centre, 12 Union Road, Cambridge CB2 1EZ, UK; fax: +44 1223 336033.

**Electrochemical measurements:** Cyclic voltammograms (CV) and differential pulse voltammograms (DPV) were recorded on a CH Instrument Model 620B (ALS) under an argon atmosphere in an *o*-dichlorobenzene (*o*-DCB) solution with 0.1 M tetra-*n*-butylammonium perchlorate (TBAP) as a supporting electrolyte. Measurements were made with a glassy carbon working electrode, a Ag/AgCl reference electrode and a Pt wire counter electrode. The concentration of the solution was fixed at 0.5 mM, and the scan rates were set to 100  $\text{mV s}^{-1}$  for CV measurements. The pulse amplitude and width were set to 0.05 V and 0.2 s for DPV measurements. A ferrocenium/ferrocene ( $\text{Fc}^+/\text{Fc}$ ) couple was used as an internal standard.

**Theoretical calculation details:** The Gaussian 16 software package<sup>3</sup> was used to perform DFT and TDDFT calculations using the B3LYP<sup>4</sup> with 6-311G(2d,p) basis set.<sup>5</sup>

## Synthetic procedure

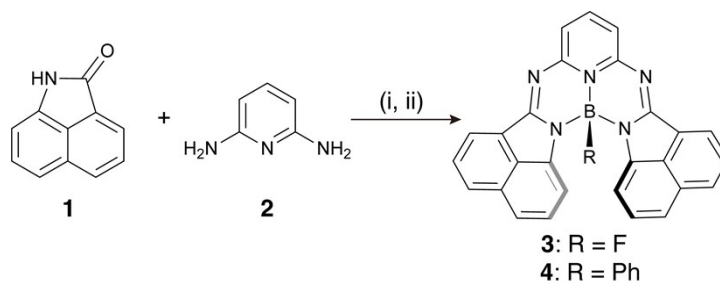

**Scheme S1.** Synthesis of azabora[6]helicenes **3** and **4**. Reaction conditions (i):  $\text{TiCl}_4$ ,  $\text{NEt}_3$ , toluene, reflux; (ii)  $\text{BF}_3 \cdot \text{OEt}_2$  for **3** and (i)  $\text{TiCl}_4$ ,  $\text{NEt}_3$ , *o*-dichlorobenzene, reflux; (ii)  $\text{BPh}_3 \cdot \text{PPh}_3$  and  $\text{NEt}_3$  for **4**.

**3:** Benzo[*cd*]indol-2-(1H)-one **1** (504 mg, 2.98 mmol, 2.8 eq) and 2,6-diaminopyridine **2** (115 mg, 1.05 mmol) were dissolved in dry toluene (93 mL). The mixture was stirred at 25 °C for 10 min under a nitrogen atmosphere before adding titanium tetrachloride (144  $\mu\text{L}$ , 1.31 mmol, 1.3 eq) and triethylamine (456  $\mu\text{L}$ , 3.29 mmol). The reaction mixture was then refluxed overnight. Boron trifluoride etherate (768  $\mu\text{L}$ , 6.22 mmol, 5.9 eq) was added, and the mixture was refluxed for 3 h. The resulting mixture was directly charged to silica gel chromatography. The roughly purified mixture was further purified by silica gel column chromatography (eluent: EtOAc/hexane = 1:1 (v/v)) to provide **3** as a black solid (84.0 mg, 191  $\mu\text{mol}$ , 18%).

$^1\text{H}$  NMR (495 MHz,  $\text{CDCl}_3$ , 295 K):  $\delta$  8.42–8.38 (m, 2H), 8.18 (d,  $J = 7.9$  Hz, 1H), 8.12 (d,  $J = 7.9$  Hz, 1H), 8.01 (t,  $J = 7.9$  Hz, 1H), 7.88–7.82 (m, 2H), 7.73 (d,  $J = 8.5$  Hz, 1H), 7.64–7.60 (m, 2H), 7.45 (d,  $J = 7.9$  Hz, 1H), 7.39 (dd,  $J_1 = J_2 = 7.7$  Hz, 1H), 7.35 (d,  $J = 7.9$  Hz, 1H), 6.87 (d,  $J = 6.8$  Hz, 1H), 6.41 (d,  $J = 7.4$  Hz, 1H).  $^1\text{H}$  NMR (495 MHz, tetrachloroethane- $d_2$ , 295 K):  $\delta$  8.71 (s, 1H), 8.52 (d,  $J = 6.8$  Hz, 1H), 8.26 (m, 2H), 8.12 (t,  $J = 7.9$  Hz, 1H), 7.93 (m, 2H), 7.83 (d,  $J = 8.5$  Hz, 1H), 7.75 (d,  $J = 7.9$  Hz, 2H), 7.68 (dd,  $J_1 = J_2 = 7.7$  Hz, 1H), 7.52 (d,  $J = 7.9$  Hz, 1H), 7.47 (dd,  $J_1 = J_2 = 7.9$  Hz, 1H), 6.97 (d,  $J = 6.8$  Hz, 1H), 6.56 (d,  $J = 7.4$  Hz, 1H).  $^{19}\text{F}$  NMR (465 MHz,  $\text{CDCl}_3$ , 295 K):  $\delta$  –129.710 (q,  $J_{\text{B-F}} = 51.2$  Hz). UV/Vis/NIR ( $\text{CHCl}_3$ ):  $\lambda_{\text{max}}$  [nm] ( $\epsilon$  [ $\text{M}^{-1}\text{cm}^{-1}$ ]) = 358 (10400), 415 (27800), 437 (20300), 513 (18200), 548 (19000); HR-MS (FAB):  $[M]^+$  Calcd for  $\text{C}_{27}\text{H}_{15}\text{BFN}_5$ : 439.1409; Found: 439.1404 (error: –1.1 ppm).

**4:** Benzo[*cd*]indol-2-(1H)-one **1** (253 mg, 1.50 mmol, 2.8 eq) and 2,6-diaminopyridine **2** (54.5 mg, 0.50 mmol) were dissolved in dry *o*-dichlorobenzene (25 mL). The mixture was stirred at 25 °C for 10 min under a nitrogen atmosphere before adding titanium tetrachloride (43.8  $\mu\text{L}$ , 0.40 mmol, 2.0 eq) and triethylamine (200  $\mu\text{L}$ , 1.43 mmol). The reaction mixture was then refluxed for 2 h. Triphenylborane-triphenylphosphine complex (131 mg, 0.26 mmol, 1.3 eq) and triethylamine (200  $\mu\text{L}$ , 1.43 mmol) were added, and the mixture was refluxed for 3 h. The resulting mixture was directly charged to silica gel chromatography. The roughly purified mixture was further purified by silica gel column chromatography (eluent: EtOAc/hexane = 1:1 (v/v)) to provide **4** as a red solid (31.8 mg, 64  $\mu\text{mol}$ , 13%).

$^1\text{H}$  NMR (495 MHz,  $\text{CDCl}_3$ , 295 K):  $\delta$  8.38 (m, 2H), 8.15 (d,  $J = 7.9$  Hz, 1H), 8.09 (d,  $J = 7.9$  Hz, 1H), 7.91 (t,  $J = 7.9$  Hz, 1H), 7.84 (m, 2H), 7.61 (d,  $J = 7.9$  Hz, 1H), 7.56 (d,  $J = 8.5$  Hz, 1H), 7.38–7.32 (m, 3H), 7.19 (d,  $J = 7.4$  Hz, 1H), 6.95 (t,  $J = 7.1$  Hz, 1H), 6.89 (dd,  $J_1 = 7.1$  Hz,  $J_2 = 6.8$  Hz, 2H), 6.77 (d,  $J = 6.8$  Hz, 2H), 6.42 (d,  $J = 6.8$  Hz, 1H), 6.35 (d,  $J = 7.4$  Hz, 1H). UV/Vis/NIR ( $\text{CHCl}_3$ ):  $\lambda_{\text{max}}$  [nm] ( $\epsilon$  [ $\text{M}^{-1}\text{cm}^{-1}$ ]) = 360 (7700), 417 (22000), 442 (28000), 518 (14800), 554 (16000); HR-MS (FAB):  $[M]^+$  Calcd for  $\text{C}_{33}\text{H}_{21}\text{BN}_5$ : 498.1896; Found: 498.1892 (error: –0.8 ppm).

## ii. HR-MS Spectra

[ Mass Spectrum ]

Data : 6mar20-FURUTAKen003 Date : 06-Mar-2020 10:20

Sample : Azaborahelicene

Note : CHCl<sub>3</sub> + NBA ref; PEG#400

Ion Mode : FAB+

Scan# : 26

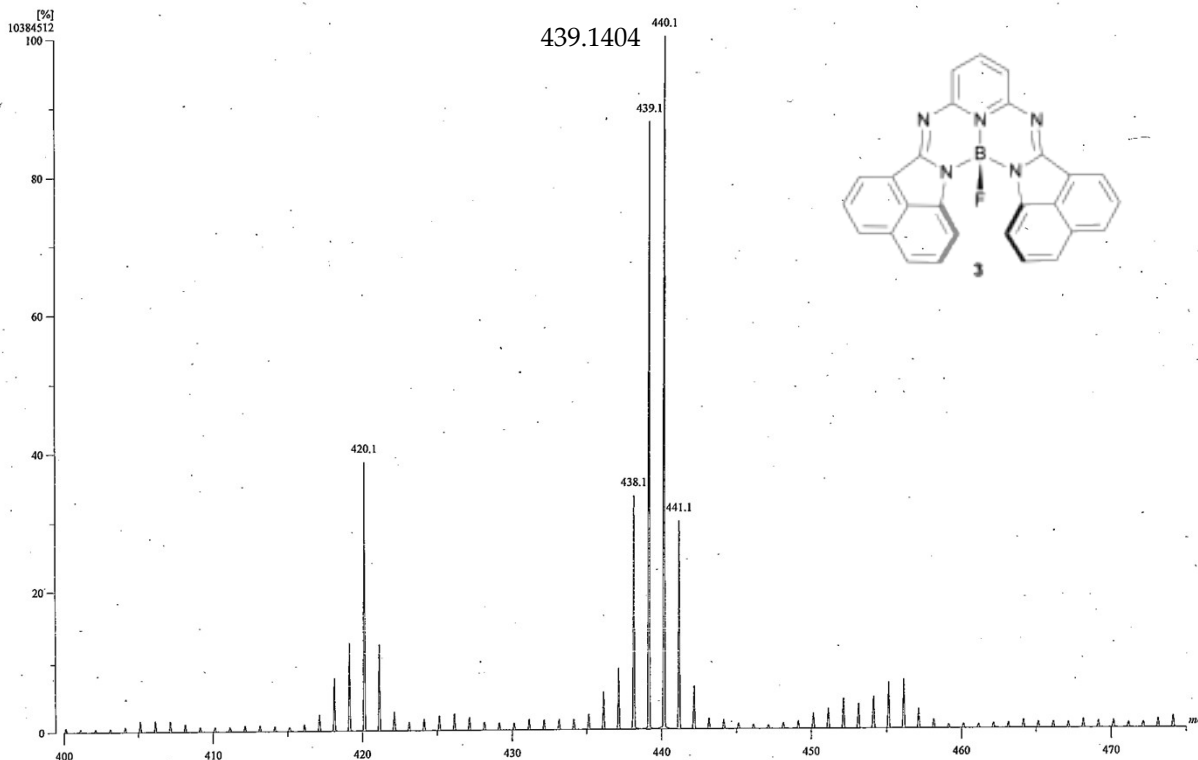

[ Theoretical Ion Distribution ]

Molecular Formula : C<sub>27</sub> H<sub>15</sub> B F N<sub>5</sub>

(m/z 439.1405, MW 439.2590, U.S. 23.0)

Base Peak : 439.1409, Averaged MW : 439.2584 (a), 439.2595 (w)

| m/z      | INT.          |
|----------|---------------|
| 438.1441 | 23.0213*****  |
| 439.1409 | 100.0000***** |
| 440.1437 | 30.6589*****  |
| 441.1466 | 4.6591***     |
| 442.1495 | 0.4587        |
| 443.1524 | 0.0327        |
| 444.1553 | 0.0018        |

Fig. S1. HR-FAB-MS spectrum of 3 (top) and the isotope pattern (bottom).

[ Mass Spectrum ]  
 Data : 25Dec23-SHIMIZU002 Date : 25-Dec-2023 09:35  
 Sample : azaborahelicene  
 Note : CH 2 Cl 2 + NBA ref.PEG#600  
 Ion Mode : FAB+  
 Scan# : 68

498.1892

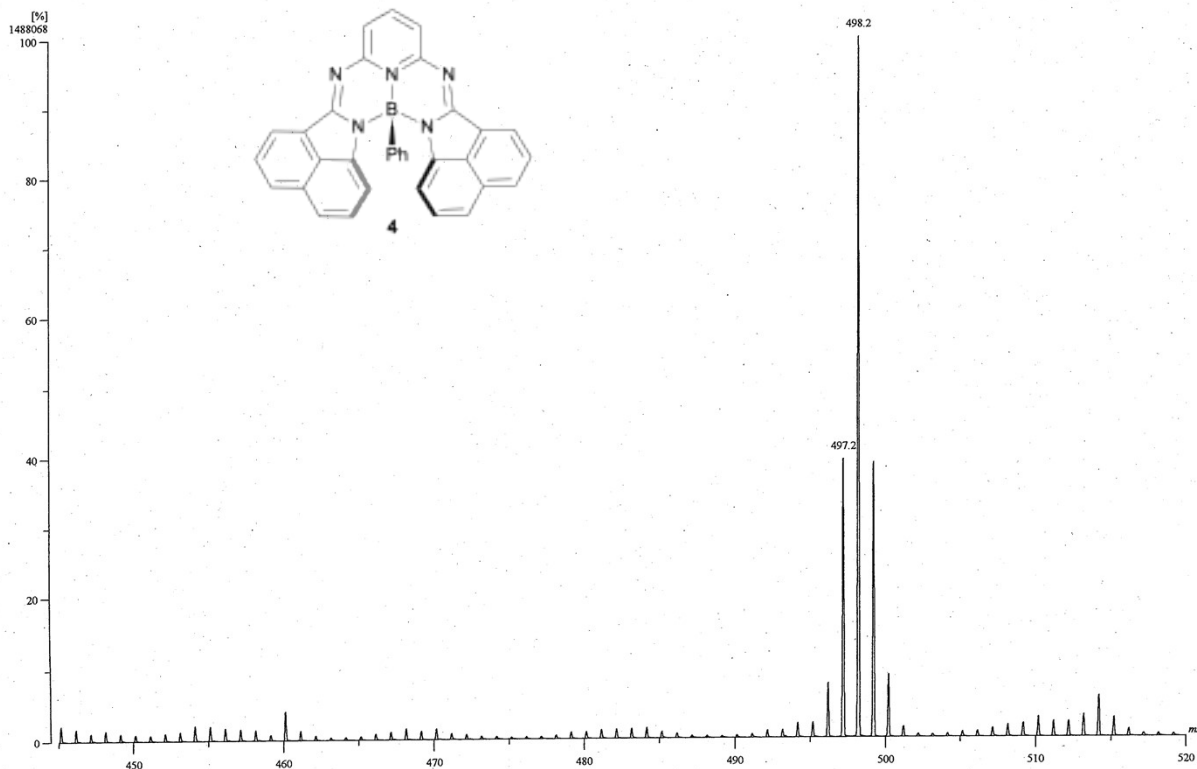

[ Theoretical Ion Distribution ]

Molecular Formula : C<sub>33</sub> H<sub>21</sub> B N<sub>5</sub>

(m/z 498.1890, MW 498.3742, U. S. 26.5)

Base Peak : 498.1896, Averaged MW : 498.3732 (a), 498.3743 (w)

| m/z      | INT.          |
|----------|---------------|
| 497.1926 | 22.6730*****  |
| 498.1896 | 100.0000***** |
| 499.1924 | 36.8095*****  |
| 500.1953 | 6.7870*****   |
| 501.1983 | 0.8167        |
| 502.2013 | 0.0718        |
| 503.2042 | 0.0049        |
| 504.2072 | 0.0003        |

Fig. S2. HR-FAB-MS spectrum of 4 (top) and the isotope pattern (bottom).

### iii. NMR Spectra

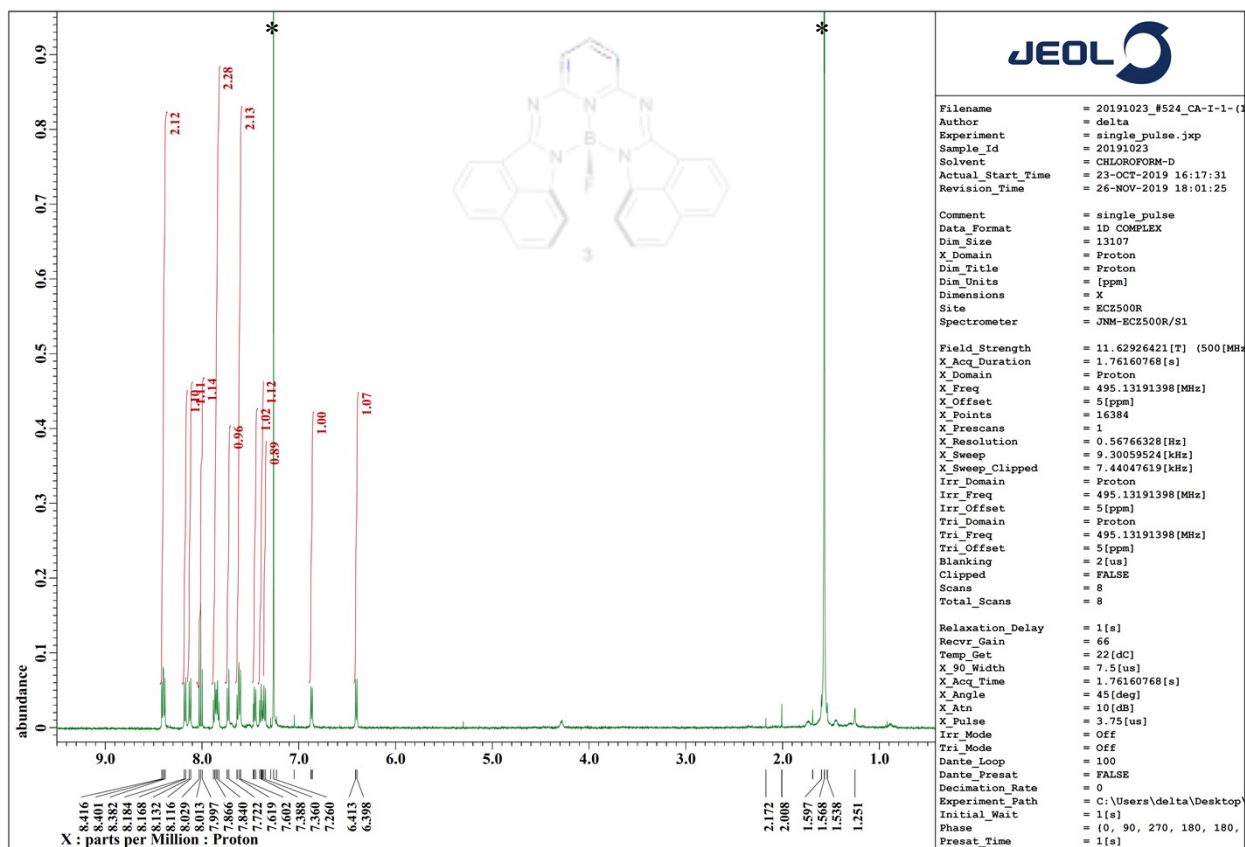

Fig. S3.  $^1\text{H}$  NMR spectrum of **3** in  $\text{CDCl}_3$ . \* indicates a residual solvent signal.

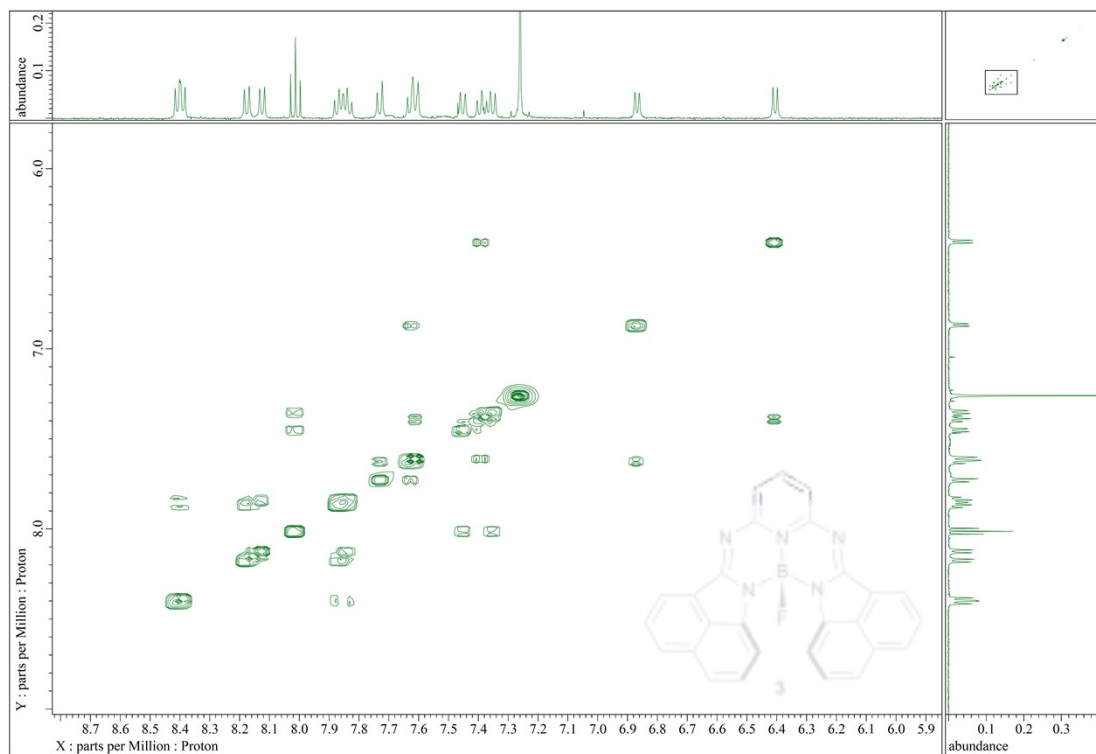

Fig. S4.  $^1\text{H}$ - $^1\text{H}$  COSY spectrum of **3** in  $\text{CDCl}_3$ .

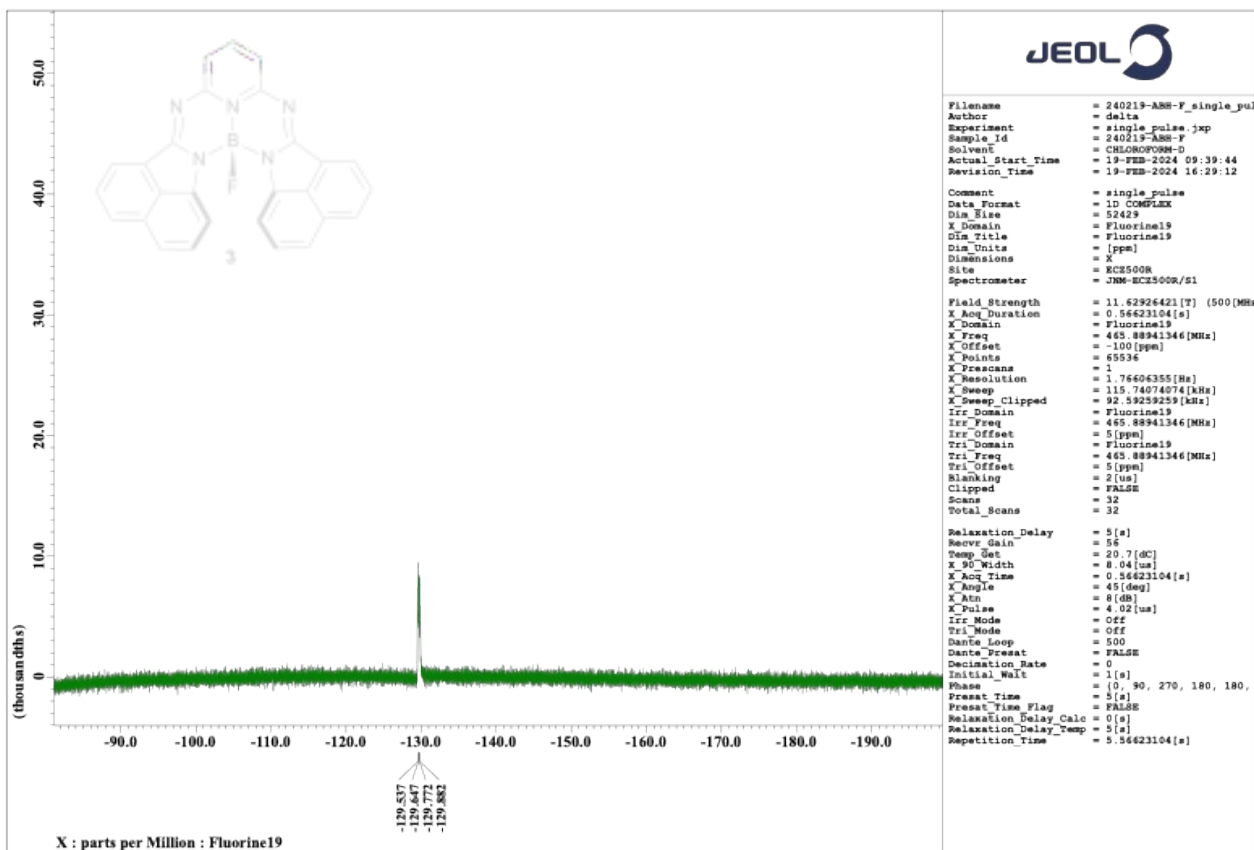

Fig. S5.  $^{19}\text{F}$  NMR spectrum of 3 in  $\text{CDCl}_3$ .

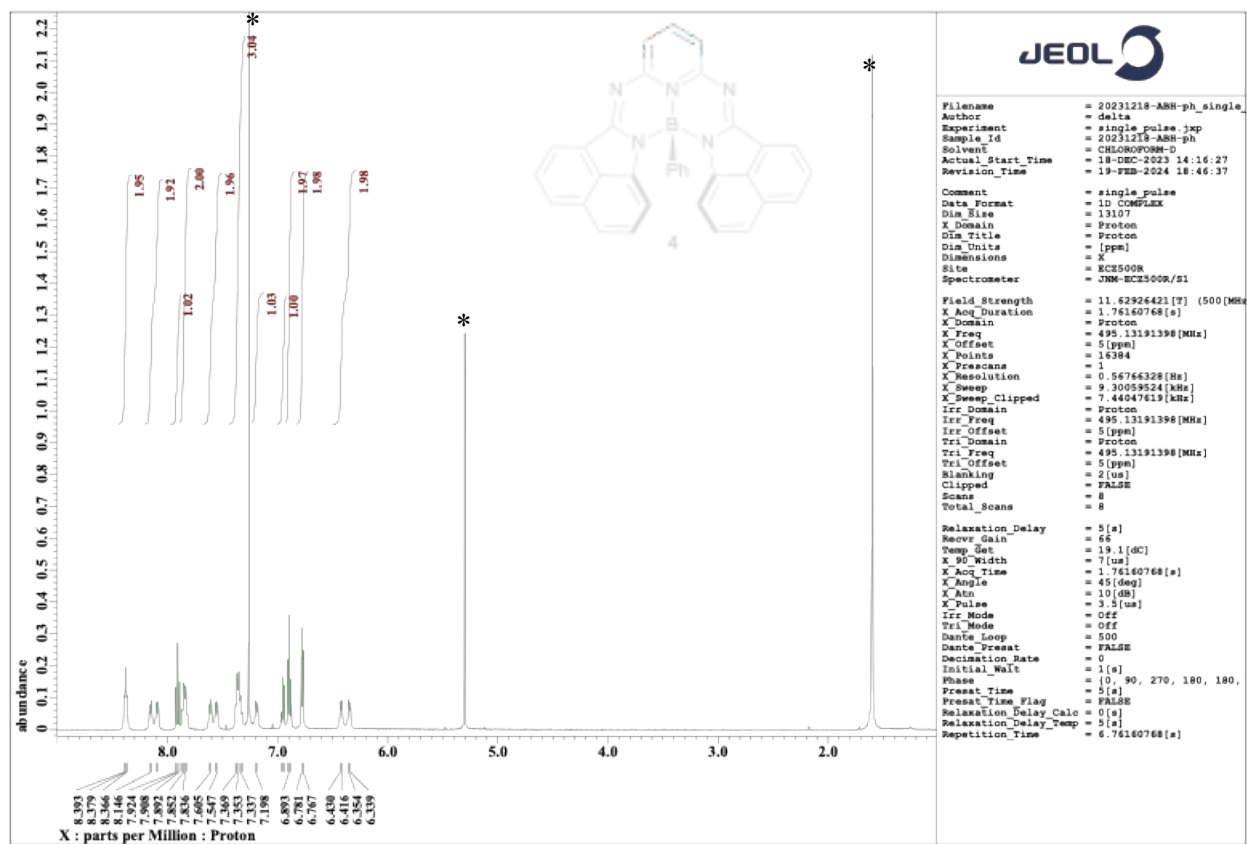

Fig. S6.  $^1\text{H}$  NMR spectrum of 4 in  $\text{CDCl}_3$ . \* indicates residual solvent signals.

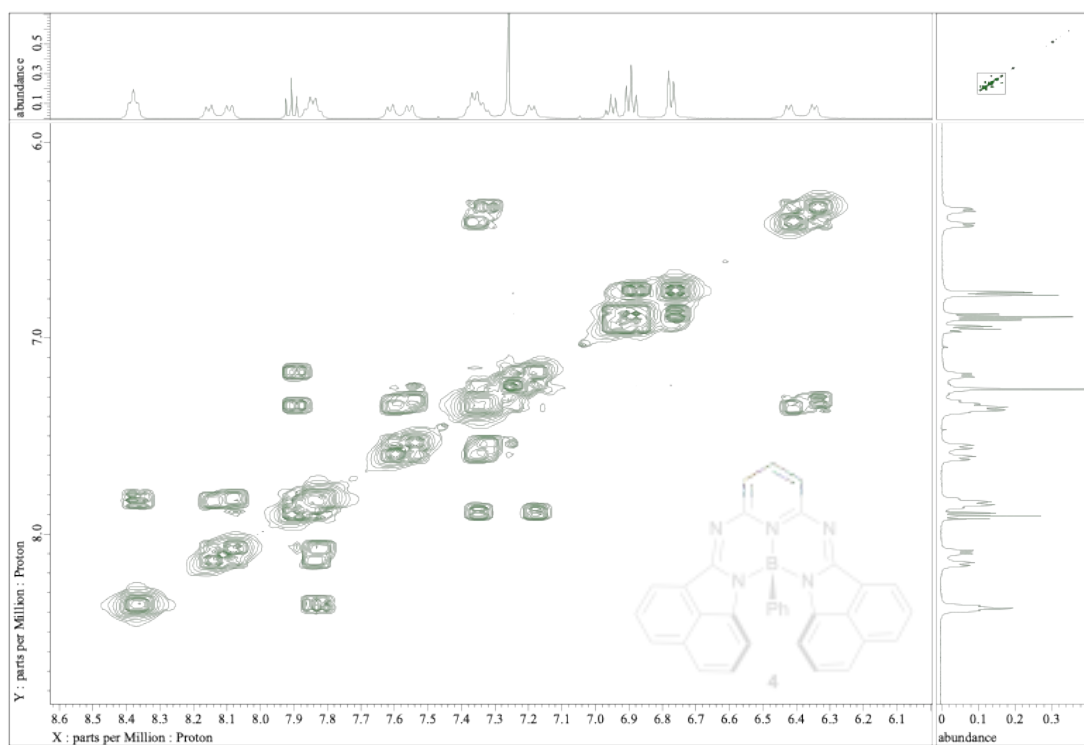

**Fig. S7.**  $^1\text{H}$ - $^1\text{H}$  COSY spectrum of **4** in  $\text{CDCl}_3$ .



#### iv. Crystallographic Data

**Table S1.** Crystallographic data.

| Compound                                            | 3                                                                 | 4                                                                 |
|-----------------------------------------------------|-------------------------------------------------------------------|-------------------------------------------------------------------|
| Empirical formula                                   | C <sub>27</sub> H <sub>15</sub> BF <sub>4</sub> N <sub>5</sub>    | C <sub>34</sub> H <sub>22</sub> BCl <sub>2</sub> N <sub>5</sub>   |
| Formula weight                                      | 439.25                                                            | 582.27                                                            |
| Temperature (K)                                     | 100                                                               | 100                                                               |
| Wavelength (Å)                                      | 0.71073 (MoKα)                                                    | 0.71073 (MoKα)                                                    |
| Crystal system                                      | triclinic                                                         | triclinic                                                         |
| Space group                                         | $\bar{P}1$ (no. 2)                                                | $\bar{P}1$ (no. 2)                                                |
| Unit cell dimensions                                |                                                                   |                                                                   |
| <i>a</i> (Å)                                        | 8.0536(5)                                                         | 9.3419(4)                                                         |
| <i>b</i> (Å)                                        | 8.9238(5)                                                         | 10.0645(5)                                                        |
| <i>c</i> (Å)                                        | 15.0934(9)                                                        | 14.7904(6)                                                        |
| α (°)                                               | 79.306(5)                                                         | 91.141(4)                                                         |
| β (°)                                               | 85.035(5)                                                         | 105.751(4)                                                        |
| γ (°)                                               | 65.599(5)                                                         | 91.019(4)                                                         |
| Volume (Å <sup>3</sup> )                            | 970.63(11)                                                        | 1338.11(11)                                                       |
| <i>Z</i>                                            | 2                                                                 | 2                                                                 |
| Density (calcd.) (g/cm <sup>3</sup> )               | 1.503                                                             | 1.445                                                             |
| μ (mm <sup>-1</sup> )                               | 0.098                                                             | 0.279                                                             |
| <i>F</i> (000)                                      | 452                                                               | 600                                                               |
| Crystal size (mm <sup>3</sup> )                     | 0.1 × 0.06 × 0.01                                                 | 0.24 × 0.18 × 0.02                                                |
| θ (°) for data collection                           | 2.541 to 27.99                                                    | 2.024 to 28.28                                                    |
| Index ranges                                        | -10 ≤ <i>h</i> ≤ 10<br>-11 ≤ <i>k</i> ≤ 11<br>-19 ≤ <i>l</i> ≤ 19 | -12 ≤ <i>h</i> ≤ 12<br>-13 ≤ <i>k</i> ≤ 13<br>-19 ≤ <i>l</i> ≤ 19 |
| Reflection collected                                | 19008                                                             | 25738                                                             |
| Unique reflections                                  | 4687 ( <i>R</i> <sub>int</sub> = 0.0646)                          | 6621 ( <i>R</i> <sub>int</sub> = 0.0624)                          |
| Completeness                                        | 1.000                                                             | 0.994                                                             |
| Absorption correction                               | multi-scan                                                        | multi-scan                                                        |
| Max. and min. transmission                          | 0.779, 1.000                                                      | 0.770, 1.000                                                      |
| Data/restraints/parameters                          | 4687/0/308                                                        | 6621/0/379                                                        |
| Goodness-of-fit on <i>F</i> <sup>2</sup>            | 1.039                                                             | 1.043                                                             |
| Final <i>R</i> indices [ <i>I</i> > 2σ( <i>I</i> )] | 0.0533                                                            | 0.0562                                                            |
| <i>wR</i> 2 indices (all data)                      | 0.1286                                                            | 0.1447                                                            |
| Large diff. peak and hole                           | 0.38, -0.24                                                       | 0.38, -0.44                                                       |
| CCDC number                                         | 2320994                                                           | 2320995                                                           |

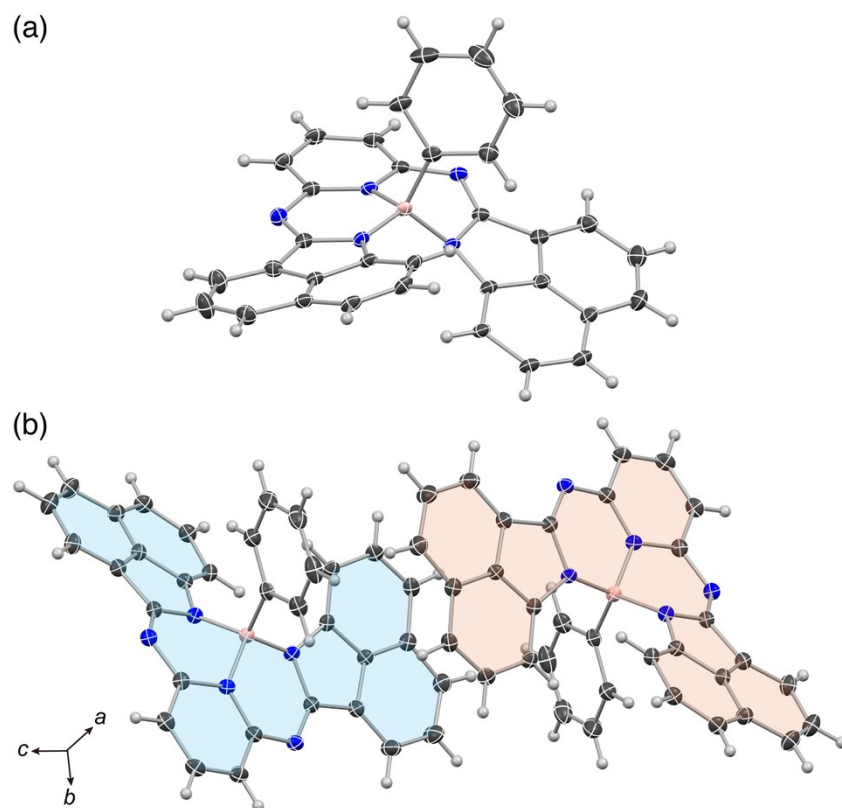

**Fig. S8.** X-ray single crystal structures of **4**: (a) *P*-enantiomer and (b) packing diagram in which the *P*- and *M*-enantiomers are highlighted in blue and orange colors, respectively. The thermal ellipsoids are scaled to the 50% probability level.

v. Variable-Temperature (VT)  $^1\text{H}$  NMR Spectra and Simulation

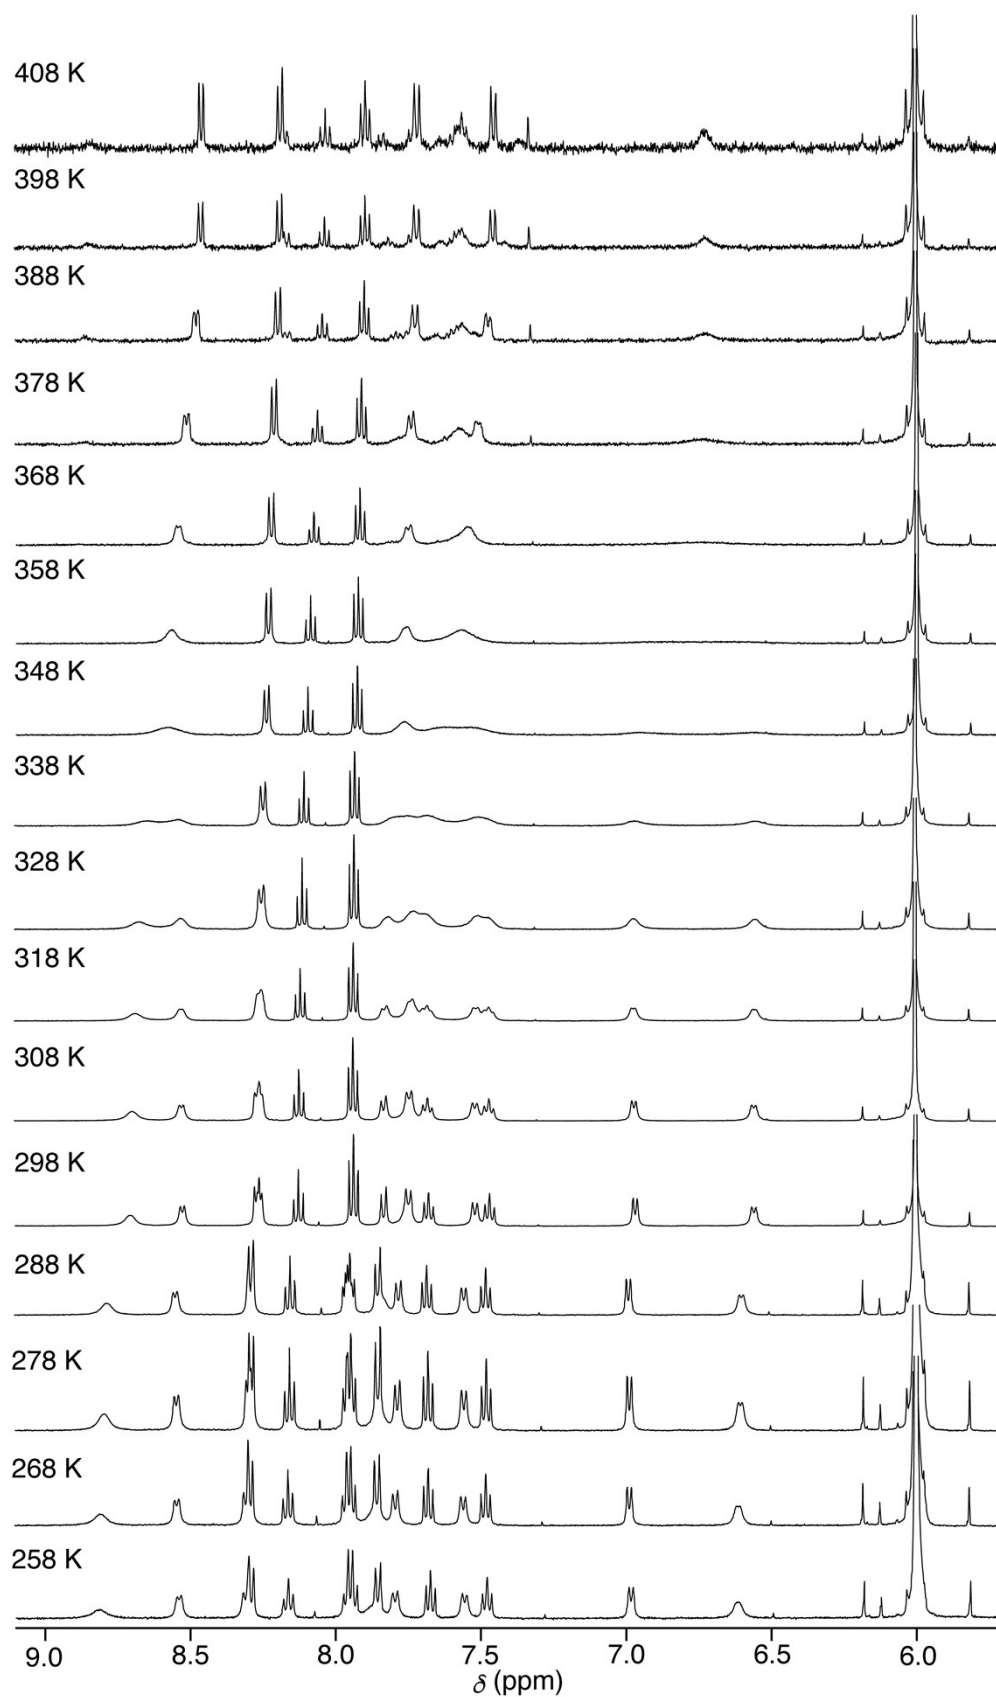

Fig. S9. VT  $^1\text{H}$  NMR spectra of **3** in  $1,1,2,2$ -tetrachloroethane- $d_2$ .

Line-shape analysis of the proton signals (A, A', B, B', C and C') designated in Fig. S9 was performed using iNMR (ver. 6.4.3).

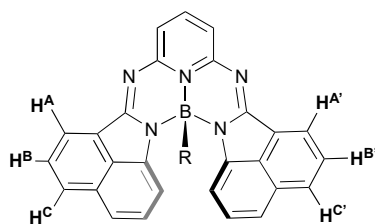

Fig. S10. Protons used for the line-shape analysis in Figs. S11–S14.

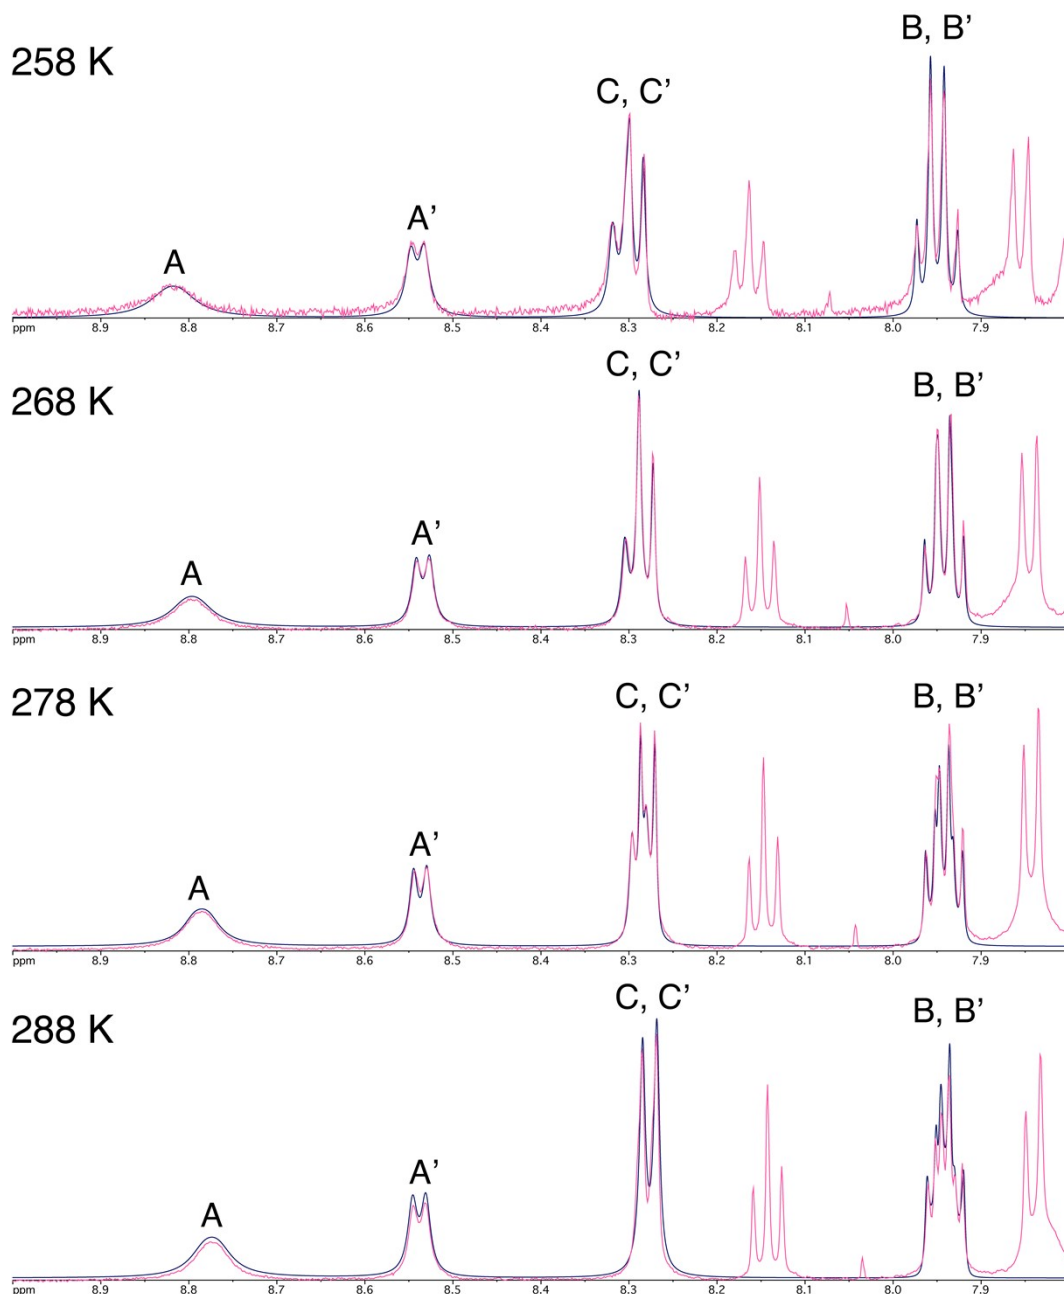

Fig. S11. Observed (pink line) and simulated (blue line)  $^1\text{H}$  NMR spectra of **3** at 258–288 K in 1,1,2,2-tetrachloroethane- $d_2$ . Inversion rate constants used for the simulation are tabulated in Table S2.

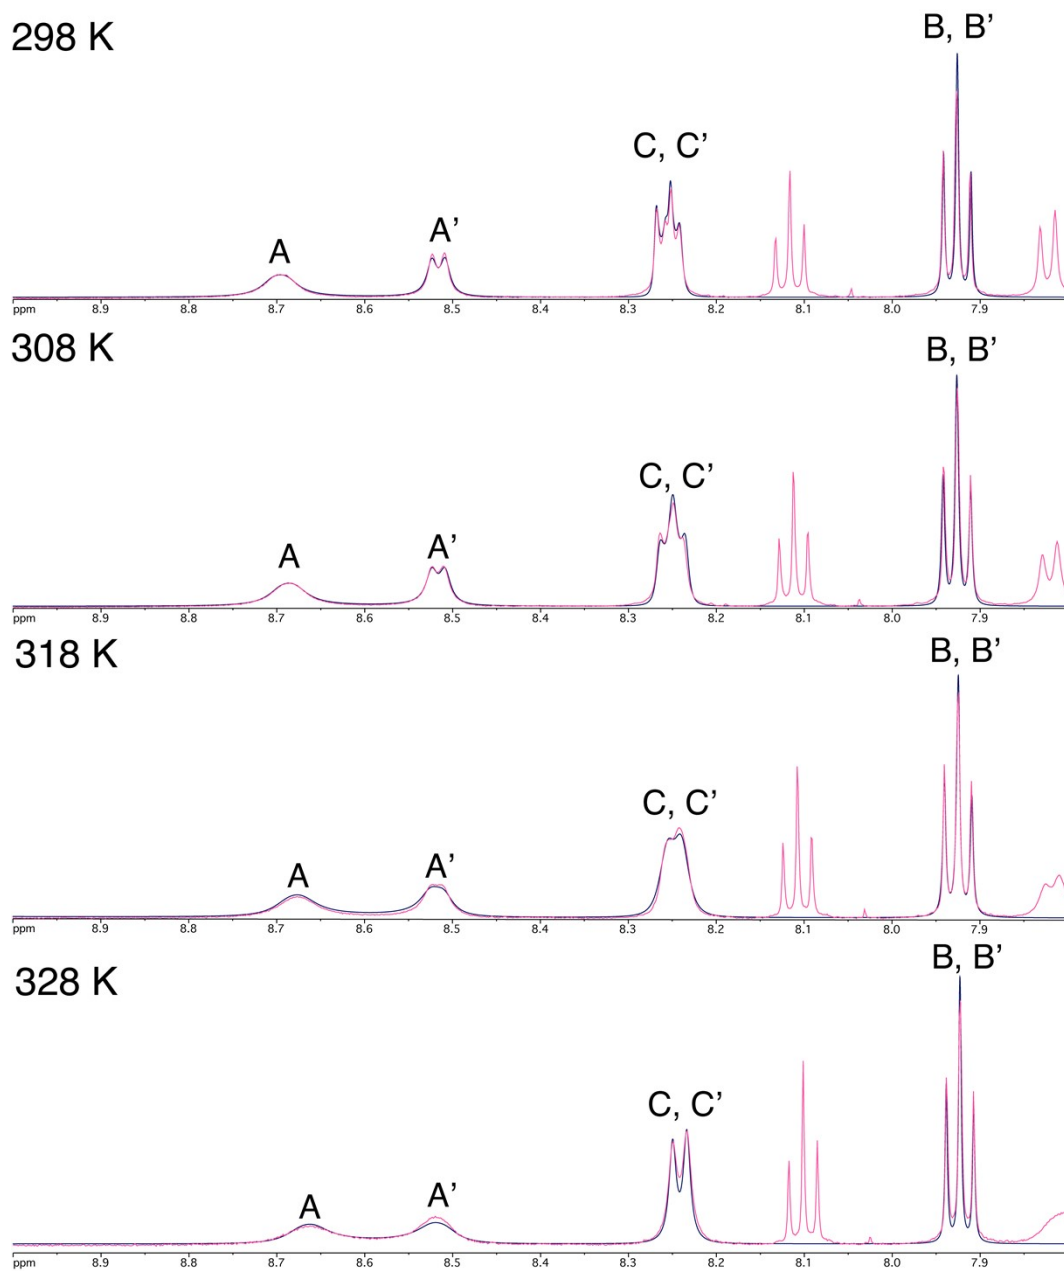

**Fig. S12.** Observed (pink line) and simulated (blue line)  $^1\text{H}$  NMR spectra of **3** at 298–328 K in 1,1,2,2-tetrachloroethane- $d_2$ . Inversion rate constants used for the simulation are tabulated in Table S2.

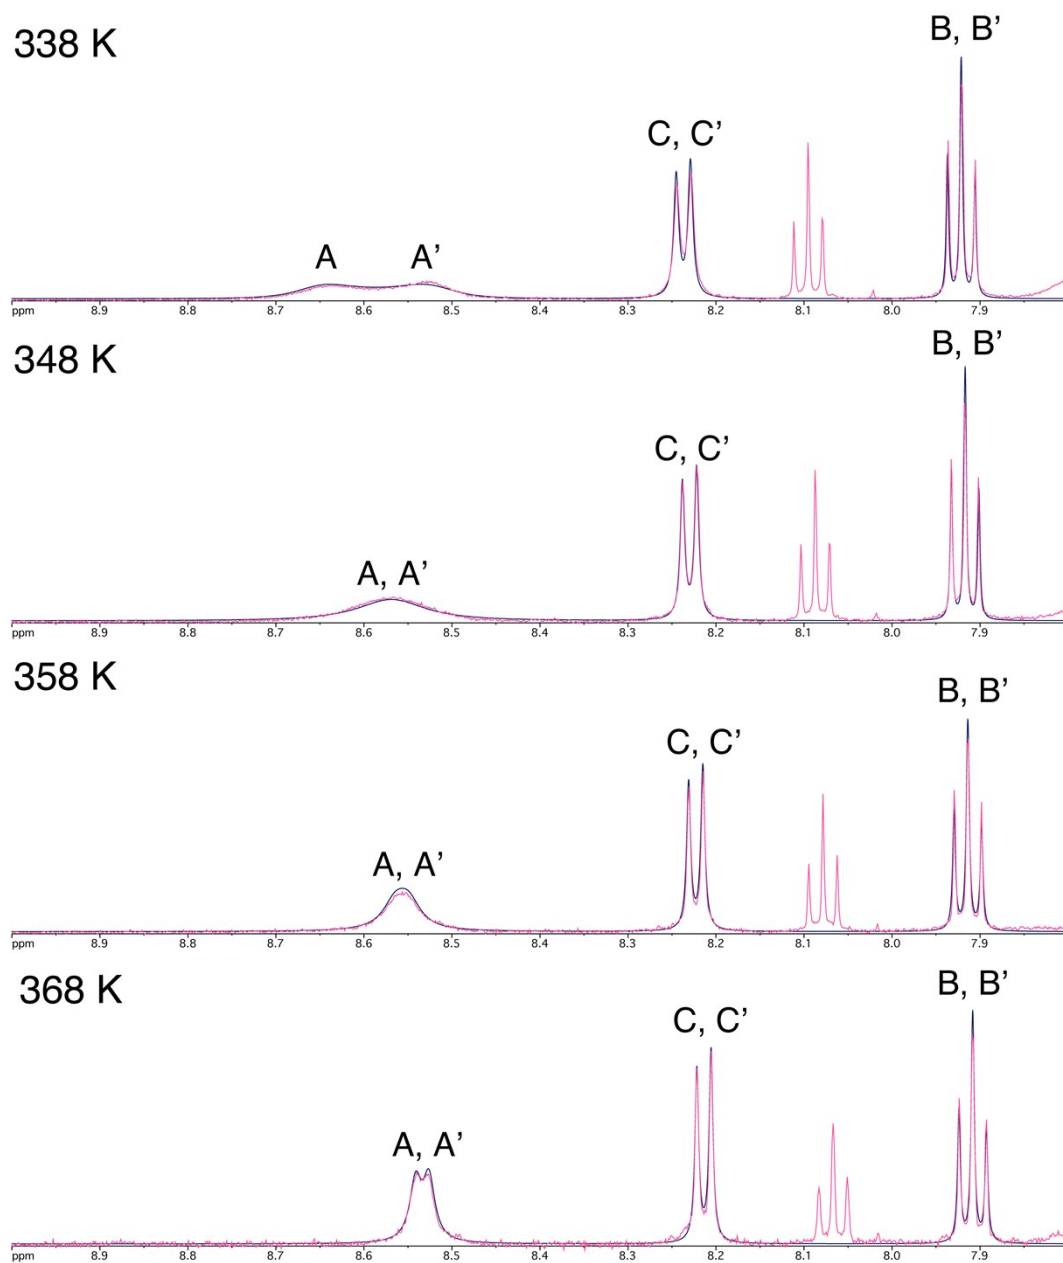

**Fig. S13.** Observed (pink line) and simulated (blue line)  $^1\text{H}$  NMR spectra of **3** at 338–368 K in 1,1,2,2-tetrachloroethane- $d_2$ . Inversion rate constants used for the simulation are tabulated in Table S2.

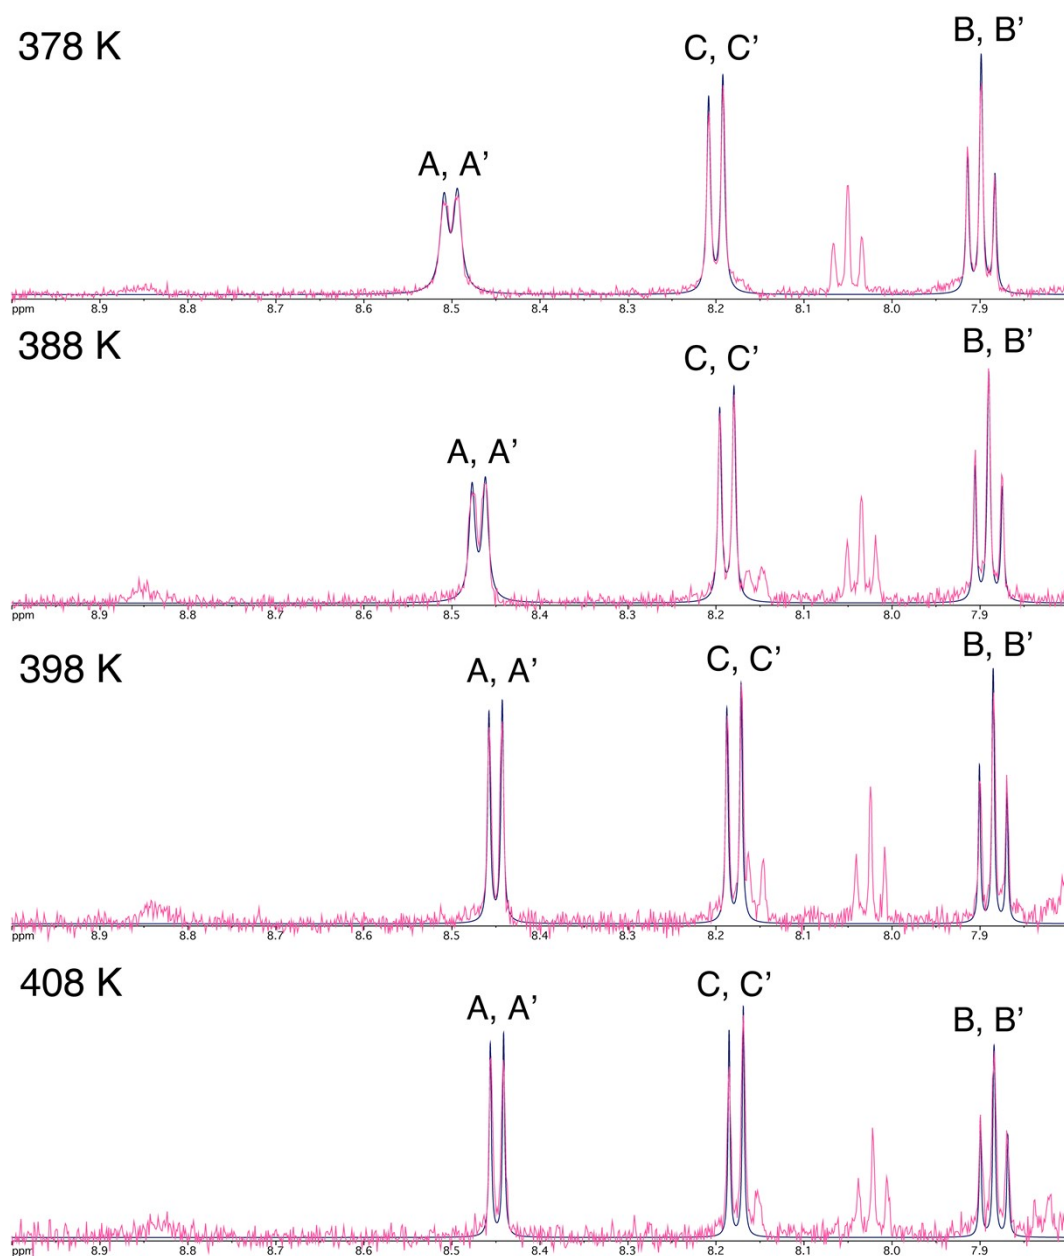

**Fig. S14.** Observed (pink line) and simulated (blue line)  $^1\text{H}$  NMR spectra of **3** at 378–408 K in 1,1,2,2-tetrachloroethane- $d_2$ . Inversion rate constants used for the simulation are tabulated in Table S2.

**Table S2.** Simulated inversion rate constants ( $k$ ) of **3** at various temperatures.

| T [K] | $k$ [ $s^{-1}$ ] | T [K] | $k$ [ $s^{-1}$ ] |
|-------|------------------|-------|------------------|
| 258   | 0.2              | 338   | 120              |
| 268   | 1.5              | 348   | 400              |
| 278   | 2.5              | 358   | 600              |
| 288   | 7.0              | 368   | 900              |
| 298   | 9.5              | 378   | 1200             |
| 308   | 14.5             | 388   | 1700             |
| 318   | 40               | 398   | 3000             |
| 328   | 60               | 408   | 4500             |

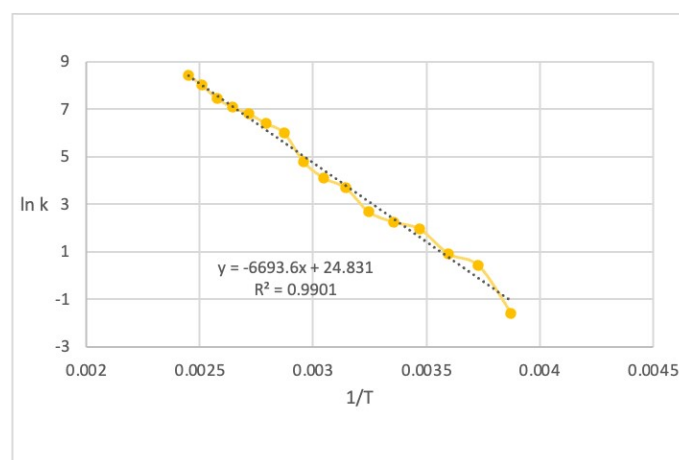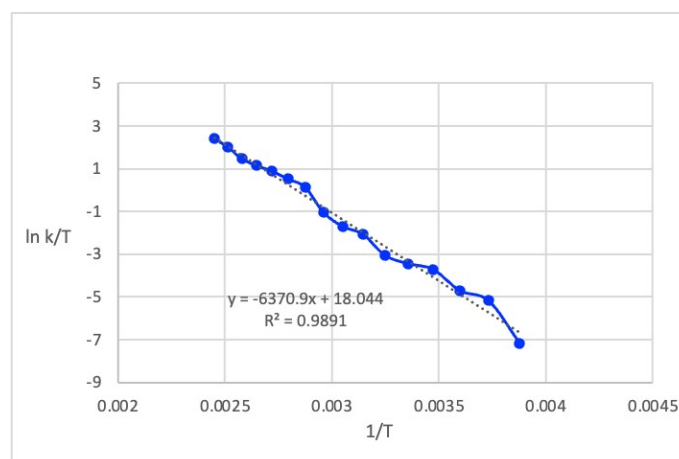

**Fig. S15.** Arrhenius (top) and Eyring (bottom) plots for **3**.

**Table S3.** Summary of the activation parameters for **3**.

|                                                  |            |
|--------------------------------------------------|------------|
| $E_a$ [kcal mol $^{-1}$ ]                        | 13.30±0.35 |
| $\Delta H^\ddagger$ [kcal mol $^{-1}$ ]          | 12.66±0.35 |
| $\Delta S^\ddagger$ [cal mol $^{-1}$ K $^{-1}$ ] | -9.98±1.1  |
| $\Delta G^\ddagger_{298}$ [kcal mol $^{-1}$ ]    | 15.70±0.30 |



vi. Absorption and Fluorescence Spectra of 4

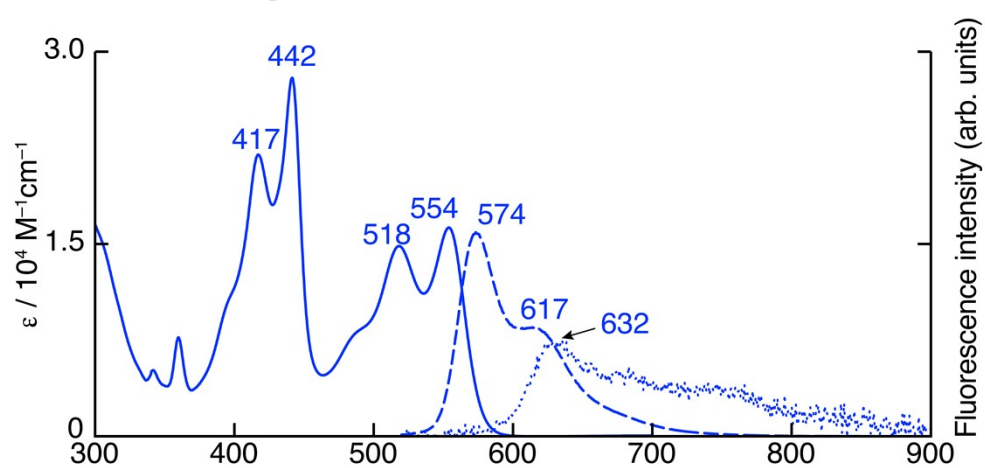

**Fig. S16.** UV/vis (solid line) and fluorescence (dashed line) spectra of **4** in chloroform and fluorescence spectrum of **4** in a drop-cast film (dotted line).

vii. Electrochemistry of 4

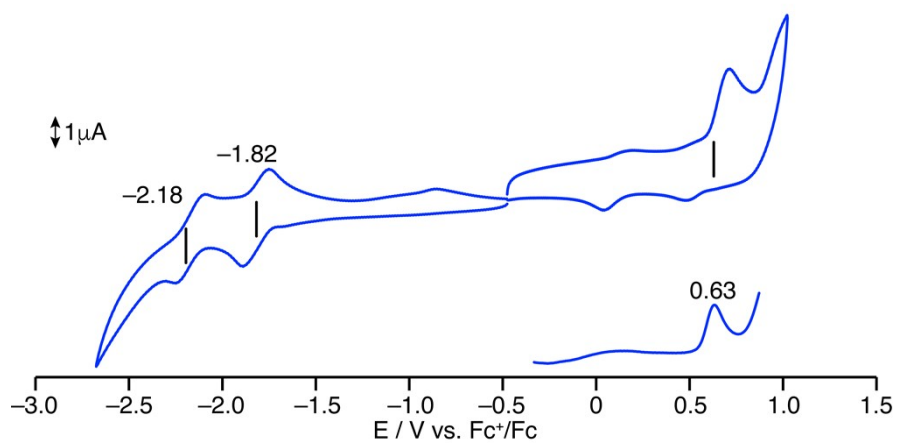

**Fig. S17.** Cyclic and differential pulse voltammograms of **4** (0.5 mM) in *o*-DCB containing 0.1 M TBAP (scan rate: 100 mV s<sup>-1</sup> for CV; pulse amplitude: 0.05 V, pulse width: 0.2 s for DPV).

### viii. TDDFT Calculations

**Table S4.** Selected transition energies, oscillator strength and major contributions of **3** calculated by the TDDFT method (B3LYP/6-311G(2d,p)). Main contributions are highlighted in bold.

| No.      | wavelength [nm] | $f^{[a]}$    | Major contributions (weight%) <sup>[b]</sup>                  |
|----------|-----------------|--------------|---------------------------------------------------------------|
| <b>1</b> | <b>515</b>      | <b>0.254</b> | <b>HOMO→LUMO (99%)</b>                                        |
| 2        | 451             | 0.067        | H-1→LUMO (21%), HOMO→L+1 (77%)                                |
| <b>3</b> | <b>401</b>      | <b>0.287</b> | <b>H-1→LUMO (72%), HOMO→L+1 (18%)</b>                         |
| 4        | 397             | 0.031        | H-1→L+1 (94%)                                                 |
| 5        | 331             | 0.021        | H-4→LUMO (10%), H-3→L+1 (10%), H-2→LUMO (68%)                 |
| 6        | 325             | 0.052        | H-3→LUMO (55%), HOMO→L+3 (22%)                                |
| 7        | 319             | 0.012        | HOMO→L+2 (83%)                                                |
| 8        | 309             | 0.013        | H-4→LUMO (23%), H-3→L+1 (15%), H-2→LUMO (21%), HOMO→L+4 (14%) |
| 9        | 305             | 0.008        | H-7→LUMO (64%), H-6→LUMO (22%)                                |
| 10       | 301             | 0.049        | H-3→LUMO (19%), H-2→L+1 (62%)                                 |

[a] Oscillator strength. [b] H and L denote the HOMO and LUMO, respectively.

**Table S5.** Selected transition energies, oscillator strength and major contributions of **5** calculated by the TDDFT method (B3LYP/6-311G(2d,p)). Main contributions are highlighted in bold.

| No.      | wavelength [nm] | $f^{[a]}$    | Major contributions (weight%) <sup>[b]</sup>   |
|----------|-----------------|--------------|------------------------------------------------|
| <b>1</b> | <b>431</b>      | <b>0.397</b> | <b>HOMO→LUMO (96%)</b>                         |
| 2        | 337             | 0.008        | HOMO→L+1 (98%)                                 |
| 3        | 328             | 0.088        | H-1→LUMO (84%)                                 |
| 4        | 298             | 0.031        | H-3→LUMO (12%), H-2→LUMO (66%), HOMO→L+2 (16%) |
| 5        | 294             | 0.127        | H-3→LUMO (61%), H-2→LUMO (18%), HOMO→L+3 (10%) |

[a] Oscillator strength. [b] H and L denote the HOMO and LUMO, respectively.

## ix. References

1. G. Sheldrick, *Acta Crystallogr. Sect. A*, 2015, **71**, 3–8.
2. G. Sheldrick, *Acta Crystallographica Section C*, 2015, **71**, 3–8.
3. M. J. Frisch, G. W. Trucks, H. B. Schlegel, G. E. Scuseria, M. A. Robb, J. R. Cheeseman, G. Scalmani, V. Barone, G. A. Petersson, H. Nakatsuji, X. Li, M. Caricato, A. V. Marenich, J. Bloino, B. G. Janesko, R. Gomperts, B. Mennucci, H. P. Hratchian, J. V. Ortiz, A. F. Izmaylov, J. L. Sonnenberg, Williams, F. Ding, F. Lipparini, F. Egidi, J. Goings, B. Peng, A. Petrone, T. Henderson, D. Ranasinghe, V. G. Zakrzewski, J. Gao, N. Rega, G. Zheng, W. Liang, M. Hada, M. Ehara, K. Toyota, R. Fukuda, J. Hasegawa, M. Ishida, T. Nakajima, Y. Honda, O. Kitao, H. Nakai, T. Vreven, K. Throssell, J. A. Montgomery Jr., J. E. Peralta, F. Ogliaro, M. J. Bearpark, J. J. Heyd, E. N. Brothers, K. N. Kudin, V. N. Staroverov, T. A. Keith, R. Kobayashi, J. Normand, K. Raghavachari, A. P. Rendell, J. C. Burant, S. S. Iyengar, J. Tomasi, M. Cossi, J. M. Millam, M. Klene, C. Adamo, R. Cammi, J. W. Ochterski, R. L. Martin, K. Morokuma, O. Farkas, J. B. Foresman and D. J. Fox, *Gaussian 16 Rev. A.03*, (2016), Wallingford, CT.
4. (a) D. Becke, *J. Chem. Phys.*, 1993, **98**, 5648–5652; (b) C. Lee, W. Yang and R. G. Parr, *Phys. Rev. B*, 1988, **37**, 785–789; (c) S. H. Vosko, L. Wilk and M. Nusair, *Can. J. Phys.*, 1980, **58** 1200–1211; (d) P. J. Stephens, F. J. Devlin, C. F. Chabalowski and M. J. Frisch, *J. Phys. Chem.*, 1994, **98**, 11623–11627.
5. B. P. Pritchard, D. Altarawy, B. Didier, T. D. Gibson and T. L. Windus, *J. Chem. Inf. Model.*, 2019, **59**, 4814–4820.

## x. Appendix

**Table Appx-1.** Cartesian coordinates of the DFT optimized geometry of **3** at the ground state calculated at the level of B3LYP/6-311G(2d,p).

Imaginary Freq: 0

Total Energy (Hartree): -1436.9426

| Symbol | X | Y         | Z         | Symbol    | X  | Y | Z         |           |           |
|--------|---|-----------|-----------|-----------|----|---|-----------|-----------|-----------|
| 1      | C | 1.431861  | 4.287492  | 0.171984  | 26 | C | 3.116231  | -1.213125 | -0.249648 |
| 2      | C | 1.345851  | 2.899563  | 0.307399  | 27 | C | -1.540447 | -2.055094 | 1.287495  |
| 3      | N | 0.12755   | 2.278856  | 0.142754  | 28 | C | -2.476074 | -3.117639 | 1.447251  |
| 4      | C | -0.957049 | 2.968196  | -0.339373 | 29 | C | -3.751368 | -3.095564 | 0.927276  |
| 5      | C | -0.864951 | 4.348744  | -0.522613 | 30 | C | 1.035859  | -2.268074 | -0.767286 |
| 6      | B | 0.035422  | 0.785325  | 0.633089  | 31 | C | 3.17414   | -3.481288 | -0.998924 |
| 7      | N | 2.485853  | 2.183046  | 0.507692  | 32 | C | 1.802008  | -3.425382 | -1.090068 |
| 8      | C | 2.455388  | 0.897674  | 0.282024  | 33 | F | 0.131515  | 0.748129  | 2.025556  |
| 9      | N | 1.316981  | 0.14712   | 0.045128  | 34 | C | 0.320597  | 5.005179  | -0.233248 |
| 10     | N | -2.126563 | 2.340846  | -0.65142  | 35 | H | 2.395567  | 4.746312  | 0.336588  |
| 11     | C | -2.260586 | 1.075202  | -0.386415 | 36 | H | -1.742609 | 4.862348  | -0.886148 |
| 12     | N | -1.31641  | 0.250441  | 0.19924   | 37 | H | -6.249104 | -2.427341 | -0.302376 |
| 13     | C | -3.500896 | 0.302658  | -0.556294 | 38 | H | -6.701446 | -0.294236 | -1.401695 |
| 14     | C | -1.939825 | -0.962125 | 0.557986  | 39 | H | -4.987307 | 1.500978  | -1.551144 |
| 15     | C | 1.709169  | -1.156083 | -0.321749 | 40 | H | 5.42919   | 1.143153  | 0.524202  |
| 16     | C | 3.629185  | 0.02768   | 0.138313  | 41 | H | 6.884869  | -0.813765 | 0.035545  |
| 17     | C | -3.252442 | -0.930173 | 0.052665  | 42 | H | 5.964146  | -2.966888 | -0.660164 |
| 18     | C | -4.191394 | -1.952578 | 0.201585  | 43 | H | -2.159298 | -3.982965 | 2.017626  |
| 19     | C | -5.462331 | -1.683714 | -0.364534 | 44 | H | 1.264068  | -4.301704 | -1.432577 |
| 20     | C | -5.716783 | -0.470465 | -0.985256 | 45 | H | 0.387346  | 6.079397  | -0.358586 |
| 21     | C | -4.748408 | 0.554388  | -1.083216 | 46 | H | 3.703341  | -4.3886   | -1.264949 |
| 22     | C | 4.993053  | 0.194552  | 0.237728  | 47 | H | -0.036491 | -2.289962 | -0.888992 |
| 23     | C | 5.81005   | -0.921859 | -0.048967 | 48 | H | -0.563469 | -2.12088  | 1.745266  |
| 24     | C | 5.290632  | -2.145305 | -0.442661 | 49 | H | -4.420194 | -3.932745 | 1.087905  |
| 25     | C | 3.891655  | -2.3287   | -0.571408 |    |   |           |           |           |

**Table Appx-2.** Cartesian coordinates of the DFT optimized geometry of **3** at the transition state for racemization calculated at the level of B3LYP/6-311G(2d,p).

Imaginary Freq: 1

Total Energy (Hartree): -1436.9193

|    | Symbol | X         | Y         | Z         |    | Symbol | X         | Y         | Z         |
|----|--------|-----------|-----------|-----------|----|--------|-----------|-----------|-----------|
| 1  | C      | 4.336433  | 0.286143  | 1.19355   | 26 | C      | -1.083042 | -0.286718 | 3.221885  |
| 2  | C      | 2.942867  | 0.19181   | 1.179591  | 27 | C      | -2.339029 | 0.984651  | -1.671639 |
| 3  | N      | 2.245514  | 0.318408  | 0         | 28 | C      | -3.442834 | 0.833681  | -2.558419 |
| 4  | C      | 2.942867  | 0.19181   | -1.179591 | 29 | C      | -3.37961  | 0.133025  | -3.738602 |
| 5  | C      | 4.336433  | 0.286143  | -1.19355  | 30 | C      | -2.339029 | 0.984651  | 1.671639  |
| 6  | B      | 0.715458  | 0.813822  | 0         | 31 | C      | -3.37961  | 0.133025  | 3.738602  |
| 7  | N      | 2.301894  | -0.127549 | 2.327264  | 32 | C      | -3.442834 | 0.833681  | 2.558419  |
| 8  | C      | 1.00421   | -0.163508 | 2.340876  | 33 | F      | 0.671804  | 2.20214   | 0         |
| 9  | N      | 0.133672  | 0.294373  | 1.361534  | 34 | C      | 5.028516  | 0.382266  | 0         |
| 10 | N      | 2.301894  | -0.127549 | -2.327264 | 35 | H      | 4.827589  | 0.220893  | -2.153124 |
| 11 | C      | 1.00421   | -0.163508 | -2.340876 | 36 | H      | -2.56198  | -1.220014 | -6.104734 |
| 12 | N      | 0.133672  | 0.294373  | -1.361534 | 37 | H      | -0.256799 | -1.881936 | -6.578916 |
| 13 | C      | 0.238173  | -0.621275 | -3.501083 | 38 | H      | 1.58879   | -1.435517 | -4.964179 |
| 14 | C      | -1.156798 | 0.353268  | -1.965062 | 39 | H      | 1.58879   | -1.435517 | 4.964179  |
| 15 | C      | -1.156798 | 0.353268  | 1.965062  | 40 | H      | -0.256799 | -1.881936 | 6.578916  |
| 16 | C      | 0.238173  | -0.621275 | 3.501083  | 41 | H      | -2.56198  | -1.220014 | 6.104734  |
| 17 | C      | -1.083042 | -0.286718 | -3.221885 | 42 | H      | -4.373042 | 1.316396  | -2.282067 |
| 18 | C      | -2.135317 | -0.43014  | -4.131086 | 43 | H      | -4.373042 | 1.316396  | 2.282067  |
| 19 | C      | -1.794805 | -1.05302  | -5.356798 | 44 | H      | -4.248808 | 0.053228  | 4.380354  |
| 20 | C      | -0.486139 | -1.421476 | -5.625329 | 45 | H      | -2.452499 | 1.635798  | 0.827372  |
| 21 | C      | 0.565305  | -1.18827  | -4.712907 | 46 | H      | -2.452499 | 1.635798  | -0.827372 |
| 22 | C      | 0.565305  | -1.18827  | 4.712907  | 47 | H      | -4.248808 | 0.053228  | -4.380354 |
| 23 | C      | -0.486139 | -1.421476 | 5.625329  | 48 | H      | 6.109379  | 0.457877  | 0         |
| 24 | C      | -1.794805 | -1.05302  | 5.356798  | 49 | H      | 4.827589  | 0.220893  | 2.153124  |
| 25 | C      | -2.135317 | -0.43014  | 4.131086  |    |        |           |           |           |

**Table Appx-3.** Cartesian coordinates of the DFT optimized geometry of **5** at the ground state calculated at the level of B3LYP/6-311G(2d,p).

Imaginary Freq: 0

Total Energy (Hartree): -1005.0116

| Symbol | X | Y         | Z         | Symbol    | X  | Y | Z         |           |           |
|--------|---|-----------|-----------|-----------|----|---|-----------|-----------|-----------|
| 1      | N | 0.354414  | 2.446274  | -0.032261 | 17 | H | -3.51973  | -1.396166 | 0.202984  |
| 2      | N | -1.609105 | 1.092016  | 0.126434  | 18 | H | 3.066691  | -1.387199 | -0.226184 |
| 3      | C | -0.867801 | 0.011771  | 0.080258  | 19 | H | 3.155663  | -3.863052 | -0.293972 |
| 4      | C | -1.369651 | -1.372671 | 0.079151  | 20 | H | 1.150223  | -5.256093 | -0.200691 |
| 5      | C | -0.227391 | -2.173809 | -0.013257 | 21 | C | -1.809037 | 3.459168  | -0.004886 |
| 6      | C | 0.921053  | -1.366988 | -0.065041 | 22 | H | -2.87814  | 3.314881  | 0.058201  |
| 7      | N | 0.49656   | -0.026646 | -0.000199 | 23 | C | -1.23887  | 4.698949  | -0.133622 |
| 8      | C | -0.223745 | -3.567671 | -0.05848  | 24 | C | 0.157663  | 4.815765  | -0.224268 |
| 9      | C | -1.505908 | -4.168708 | 0.003373  | 25 | C | 0.909494  | 3.67338   | -0.168099 |
| 10     | C | -2.647965 | -3.387899 | 0.095887  | 26 | C | -1.003545 | 2.2994    | 0.038377  |
| 11     | C | -2.607158 | -1.974672 | 0.133328  | 27 | H | -1.863182 | 5.583688  | -0.169858 |
| 12     | C | 2.152133  | -1.961869 | -0.169567 | 28 | H | 0.64166   | 5.775891  | -0.332841 |
| 13     | C | 2.186369  | -3.385341 | -0.213159 | 29 | H | 1.988709  | 3.682437  | -0.230853 |
| 14     | H | -1.598695 | -5.248828 | -0.02225  | 30 | B | 1.369319  | 1.220895  | 0.11965   |
| 15     | H | -3.612746 | -3.878926 | 0.140702  | 31 | F | 1.973991  | 1.317453  | 1.359315  |
| 16     | C | 1.05912   | -4.177104 | -0.161054 | 32 | F | 2.311001  | 1.294876  | -0.891018 |
